# Supplementary material for: Integration of network pharmacology, transcriptomics and single-cell sequencing to explore the effect of Rougan Keli in alleviating liver cirrhosis
Source: Springer Nature journal article supplement (doi:10.1186/s13020-025-01220-z), 2025-10-02

## Supplementary data

Table. S1 Combination dosage of Rgkl

| No. | Chinese name   | Latin name                                    | Vegetal product                           | Family         | Part used   | Dose (g) |
|-----|----------------|-----------------------------------------------|-------------------------------------------|----------------|-------------|----------|
| 1   | Danggui (DG)   | <i>Angelica sinensis</i> (Oliv.) Diels        | <i>Angelicae Sinensis Radix</i>           | Apiaceae       | Root        | 168      |
| 2   | Chishao (CS)   | <i>Paeonia lactiflora</i> Pall.               | <i>Paeoniae Radix Rubra</i>               | Ranunculaceae  | Root        | 252      |
| 3   | Sanqi (SQ)     | <i>Panax notoginseng</i> (Burk.) F.H.Chen     | <i>Notoginseng Radix et Rhizoma</i>       | Araliaceae     | Rhizome     | 101      |
| 4   | Zelan (ZL)     | <i>Lycopus lucidus</i> Turcz.var.hirtus Regel | <i>Lycopi Herba</i>                       | Asteraceae     | Aboveground | 168      |
| 5   | Niuxi (NX)     | <i>Achyranthes bidentata</i> Bl.              | <i>Achyranthis Bidentatae Radix</i>       | Amaranthaceae  | Root        | 168      |
| 6   | Nvzhenzi (NZZ) | <i>Ligustrum lucidum</i> Ait.                 | <i>Ligustri Fructus</i>                   | Oleaceae       | Fruit       | 252      |
| 7   | Huangqi (HQ)   | <i>Astragalus membranaceus</i> (Fisch.) Bge.  | <i>Astragali Radix</i>                    | Fabaceae       | Root        | 252      |
| 8   | Baizhu (BZ)    | <i>Atractylodes macrocephala</i> Koidz.       | <i>Atractylodis Macrocephalae Rhizoma</i> | Asteraceae     | Rhizome     | 168      |
| 9   | Fangji (FJ)    | <i>Stephania tetrandra</i> S.Moore            | <i>Stephaniae Tetrandrae Radix</i>        | Menispermaceae | Root        | 101      |

**Table S2 Identification results of the blood components of Rgkl based on UPLC-Q-TOF-MS/MS**

| No. | t <sub>R</sub> /min | Compound name                  | Molecular formula                              | M(Da)    | Ion type           | Error(ppm) | Characteristic Fragment                                     | Source |
|-----|---------------------|--------------------------------|------------------------------------------------|----------|--------------------|------------|-------------------------------------------------------------|--------|
| 1   | 13.03               | Ferulic acid                   | C <sub>10</sub> H <sub>10</sub> O <sub>4</sub> | 194.1800 | [M+H] <sup>+</sup> | -0.2       | 163.0393, 177.1618<br>97.0282                               | A      |
| 2   | 9.85                | Anisic acid                    | C <sub>8</sub> H <sub>8</sub> O <sub>3</sub>   | 152.0473 | [M+H] <sup>+</sup> | -1.6       | 153.1274, 97.0649<br>69.0697, 77.0383<br>107.0849           | A      |
| 3   | 3.13                | Cinnamic acid                  | C <sub>9</sub> H <sub>8</sub> O <sub>2</sub>   | 148.0524 | [M+H] <sup>+</sup> | -9.6       | 149.0241, 103.0543<br>77.0387, 121.0304<br>79.0543, 51.0228 | A      |
| 4   | 25.03               | Senkyunolide A                 | C <sub>12</sub> H <sub>16</sub> O <sub>2</sub> | 192.2600 | [M+H] <sup>+</sup> | 1          | 193.1567, 79.0535<br>81.0326, 149.0204                      | A      |
| 5   | 18.28               | Butylphthalide                 | C <sub>12</sub> H <sub>14</sub> O <sub>2</sub> | 190.2400 | [M+H] <sup>+</sup> | -1         | 107.0485, 77.0387<br>191.1078, 79.0532<br>145.1011          | A      |
| 6   | 20.68               | Osthole                        | C <sub>15</sub> H <sub>16</sub> O <sub>3</sub> | 244.2900 | [M+H] <sup>+</sup> | -9.1       | 245.1154, 245.1360<br>157.1000, 227.1789                    | A      |
| 7   | 18.28               | Ligustilide/Z-Ligustilide      | C <sub>12</sub> H <sub>14</sub> O <sub>2</sub> | 190.2400 | [M+H] <sup>+</sup> | -0.6       | 107.0491, 77.0373<br>191.1072, 79.0528<br>173.0962          | A      |
| 8   | 24.62               | Levistilide A                  | C <sub>24</sub> H <sub>28</sub> O <sub>4</sub> | 380.4800 | [M+H] <sup>+</sup> | -2.3       | 381.2188, 381.2602<br>381.2514, 363.1922                    | A      |
| 9   | 9.83                | coniferyl ferulate             | C <sub>20</sub> H <sub>20</sub> O <sub>6</sub> | 355.1190 | [M-H] <sup>-</sup> | 0.8        | 295.0982, 159.0642                                          | A      |
| 10  | 25.03               | 3-N-butyl-4,5-dihydrophthalide | C <sub>12</sub> H <sub>16</sub> O <sub>2</sub> | 192.2540 | [M+H] <sup>+</sup> | 1          | 193.1567, 79.0535<br>81.0326, 149.0204                      | A      |

Continued Table S2

|    |       |                                                    |                                                 |          |                    |      |                                                                |   |
|----|-------|----------------------------------------------------|-------------------------------------------------|----------|--------------------|------|----------------------------------------------------------------|---|
| 11 | 24.62 | senkyunolide O                                     | C <sub>24</sub> H <sub>28</sub> O <sub>4</sub>  | 380.4800 | [M+H] <sup>+</sup> | -2.3 | 381.2386                                                       | A |
| 12 | 24.15 | Senkyunolide H                                     | C <sub>12</sub> H <sub>16</sub> O <sub>4</sub>  | 224.1049 | [M+H] <sup>+</sup> | -8.6 | 225.1025, 67.0529<br>225.1486, 207.0804<br>77.0366, 181.0750   | A |
| 13 | 19.87 | 4-Hydroxy-3-butylphthalide                         | C <sub>12</sub> H <sub>14</sub> O <sub>3</sub>  | 206.2400 | [M+H] <sup>+</sup> | -2.3 | 207.0861, 91.0522<br>119.0158, 163.0390<br>95.0838, 161.0920   | A |
| 14 | 24.15 | Senkyunolide I                                     | C <sub>12</sub> H <sub>16</sub> O <sub>4</sub>  | 224.1049 | [M+H] <sup>+</sup> | -8.6 | 225.1394, 67.0529<br>77.0366, 181.0750<br>91.0548, 209.0257    | A |
| 15 | 15.68 | N-butylidenephthalide                              | C <sub>12</sub> H <sub>12</sub> O <sub>2</sub>  | 188.0837 | [M+H] <sup>+</sup> | -5.4 | 161.0922, 115.0523<br>189.0913, 102.9563<br>77.0372, 171.0803  | A |
| 16 | 22.97 | (Z)-3-(2-Hydroxybutylidene)isobenzofuran-1(3H)-one | C <sub>12</sub> H <sub>12</sub> O <sub>3</sub>  | 204.2200 | [M-H] <sup>-</sup> | -2.6 | 100.9258, 73.2164<br>100.9353, 58.9722<br>104.9764, 116.9267   | A |
| 17 | 4.72  | Paeoniflorin                                       | C <sub>23</sub> H <sub>28</sub> O <sub>11</sub> | 481.1704 | [M+H] <sup>+</sup> | -0.1 | 105.0327, 197.0804<br>133.0637, 151.0739<br>179.0708, 319.1171 | B |
| 18 | 4.77  | Albiflorin                                         | C <sub>23</sub> H <sub>28</sub> O <sub>11</sub> | 481.1702 | [M+H] <sup>+</sup> | -0.4 | 197.0797, 133.0631<br>151.0746, 105.0328                       | B |
| 19 | 23.93 | Paeonilactone C                                    | C <sub>17</sub> H <sub>18</sub> O <sub>6</sub>  | 318.3200 | [M+H] <sup>+</sup> | 9.60 | 319.1655, 301.1872<br>287.2012, 176.9942<br>57.0683, 122.9724  | B |

Continued Table S2

|    |       |                     |                                                 |          |                    |       |                                                                |      |
|----|-------|---------------------|-------------------------------------------------|----------|--------------------|-------|----------------------------------------------------------------|------|
| 20 | 18.00 | paeoniflorigenone   | C <sub>17</sub> H <sub>18</sub> O <sub>6</sub>  | 319.1152 | [M+H] <sup>+</sup> | 9.6   | 319.1655, 79.0552<br>301.1481, 287.2012<br>57.0683, 122.9724   | B    |
| 21 | 25.04 | Queen Bee acid      | C <sub>10</sub> H <sub>18</sub> O <sub>3</sub>  | 186.2500 | [M+H] <sup>+</sup> | 0.2   | 67.0539, 109.1009<br>55.0542, 155.1064<br>81.0695, 83.0837     | B    |
| 22 | 24.36 | oxypaeoniflora      | C <sub>23</sub> H <sub>28</sub> O <sub>12</sub> | 496.4600 | [M+H] <sup>+</sup> | -9.50 | 497.3320, 425.2253<br>313.2676, 347.0169<br>210.9284, 151.0054 | B    |
| 23 | 10.68 | Vanillic acid       | C <sub>8</sub> H <sub>8</sub> O <sub>4</sub>    | 169.0491 | [M+H] <sup>+</sup> | -2.4  | 169.0739, 123.1163<br>107.0844, 113.0214<br>55.0551, 91.0533   | B    |
| 24 | 9.94  | mudanpioside E      | C <sub>24</sub> H <sub>30</sub> O <sub>13</sub> | 525.1609 | [M-H] <sup>-</sup> | -0.9  | 121.0295, 165.0563<br>327.1083, 525.0259<br>449.1441, 119.0347 | B    |
| 25 | 24.92 | Hederagenin         | C <sub>30</sub> H <sub>48</sub> O <sub>4</sub>  | 472.7100 | [M-H] <sup>-</sup> | 0.1   | 471.3506, 100.9327<br>99.0072, 453.3413<br>427.3609, 116.9268  | B    |
| 26 | 7.60  | (+)-paeonilactone B | C <sub>10</sub> H <sub>12</sub> O <sub>4</sub>  | 196.2000 | [M-H] <sup>-</sup> | -1.7  | 160.8418, 96.9602<br>151.0765, 123.0435<br>195.0854, 179.0529  | B    |
| 27 | 0.86  | L-Glutamic acid     | C <sub>5</sub> H <sub>9</sub> NO <sub>4</sub>   | 146.0458 | [M-H] <sup>-</sup> | 0     | 102.0564, 128.0352<br>128.0465, 146.0457                       | C, H |
| 28 | 11.92 | Kaempferol          | C <sub>15</sub> H <sub>10</sub> O <sub>6</sub>  | 287.0493 | [M+H] <sup>+</sup> | -19.6 | 113.0606, 111.1158<br>163.0710, 174.0983                       | C    |

Continued Table S2

|    |       |                                          |                                                 |          |                    |       |                                          |            |
|----|-------|------------------------------------------|-------------------------------------------------|----------|--------------------|-------|------------------------------------------|------------|
| 29 | 28.37 | Notoginsenoside T5                       | C <sub>41</sub> H <sub>68</sub> O <sub>12</sub> | 753.4694 | [M+H] <sup>+</sup> | -11.8 | 753.4782, 753.5128<br>753.5386, 753.4535 | C          |
| 30 | 23.20 | Ginsenoside Re                           | C <sub>48</sub> H <sub>82</sub> O <sub>18</sub> | 945.5417 | [M-H] <sup>-</sup> | -1.2  | 945.5371, 945.5724                       | C          |
| 31 | 23.20 | Ginsenoside Rd                           | C <sub>48</sub> H <sub>82</sub> O <sub>18</sub> | 945.5417 | [M-H] <sup>-</sup> | -1.2  | 945.5371, 945.5724<br>945.5857,          | C          |
| 32 | 28.20 | Ginsenoside Rk3                          | C <sub>36</sub> H <sub>60</sub> O <sub>8</sub>  | 621.4328 | [M+H] <sup>+</sup> | -5.2  | 621.4336                                 | C          |
| 33 | 23.93 | Falcarinol                               | C <sub>17</sub> H <sub>24</sub> O               | 245.1895 | [M+H] <sup>+</sup> | -1.7  | 245.1877, 161.1341<br>245.1375, 55.0524  | C          |
| 34 | 23.20 | GYPENOSIDE-XVII                          | C <sub>48</sub> H <sub>82</sub> O <sub>18</sub> | 945.5417 | [M-H] <sup>-</sup> | -1.2  | 945.5371, 945.5724<br>945.5857           | C          |
| 35 | 28.41 | Diisooctyl phthalate                     | C <sub>24</sub> H <sub>38</sub> O <sub>4</sub>  | 391.2844 | [M+H] <sup>+</sup> | 0.3   | 149.0231, 167.0335<br>57.0700, 71.0847   | C          |
| 36 | 14.49 | Quercetin                                | C <sub>15</sub> H <sub>10</sub> O <sub>7</sub>  | 301.0383 | [M-H] <sup>-</sup> | 9.8   | 177.0932                                 | C, D, G, I |
| 37 | 24.93 | Corosolic acid                           | C <sub>30</sub> H <sub>48</sub> O <sub>4</sub>  | 471.3467 | [M-H] <sup>-</sup> | -2.5  | 61.9883, 100.9327<br>471.3747, 453.3335  | D          |
| 38 | 15.27 | 1-(2-Hydroxy-5-methylphenyl)<br>ethanone | C <sub>9</sub> H <sub>10</sub> O <sub>2</sub>   | 151.0752 | [M+H] <sup>+</sup> | -0.6  | 95.0486, 93.0695<br>91.0539, 109.0638    | D          |
| 39 | 11.92 | Luteolin                                 | C <sub>15</sub> H <sub>10</sub> O <sub>6</sub>  | 287.0493 | [M+H] <sup>+</sup> | -19.6 | 269.0398, 287.0523<br>287.1434, 111.1158 | D          |
| 40 | 26.49 | apigenin-7-O-β-D-glucopyrano<br>side     | C <sub>21</sub> H <sub>20</sub> O <sub>10</sub> | 431.1056 | [M-H] <sup>-</sup> | 16.8  | 91.0216, 415.0706<br>431.3148            | D          |
| 41 | 24.84 | Thymol                                   | C <sub>10</sub> H <sub>14</sub> O               | 151.1117 | [M+H] <sup>+</sup> | 0.1   | 151.1118, 133.0927<br>95.0490, 81.0316   | D          |

Continued Table S2

|    |       |                             |                                                 |          |                    |      |                                                      |      |
|----|-------|-----------------------------|-------------------------------------------------|----------|--------------------|------|------------------------------------------------------|------|
| 42 | 26.33 | Ursolic acid acetate        | C <sub>32</sub> H <sub>50</sub> O <sub>4</sub>  | 499.3765 | [M+H] <sup>+</sup> | -3.2 | 499.3761                                             | D, F |
| 43 | 26.94 | inokosterone                | C <sub>27</sub> H <sub>44</sub> O <sub>7</sub>  | 481.3159 | [M+H] <sup>+</sup> | -4.8 | 481.3138, 481.2922<br>481.2622, 481.338              | E    |
| 44 | 11.81 | Baicalin                    | C <sub>21</sub> H <sub>18</sub> O <sub>11</sub> | 447.0933 | [M+H] <sup>+</sup> | 2.6  | 271.0601, 447.0932<br>447.7900, 73.0463<br>431.0876  | E    |
| 45 | 16.31 | Wogonin                     | C <sub>16</sub> H <sub>12</sub> O <sub>5</sub>  | 285.0760 | [M+H] <sup>+</sup> | 0.9  | 285.0756, 285.0991<br>169.0615, 155.0840<br>121.0976 | E, G |
| 46 | 0.88  | Betaine                     | C <sub>5</sub> H <sub>11</sub> NO <sub>2</sub>  | 118.0861 | [M+H] <sup>+</sup> | -0.9 | 58.0667, 59.0731<br>118.0919, 72.0851<br>57.0573     | E    |
| 47 | 26.33 | Oleanolic acid 3-acetate    | C <sub>32</sub> H <sub>50</sub> O <sub>4</sub>  | 499.3761 | [M+H] <sup>+</sup> | -3.2 | 499.3761                                             | E, F |
| 48 | 26.54 | alpha-Spinasterol glucoside | C <sub>35</sub> H <sub>58</sub> O <sub>6</sub>  | 573.4152 | [M-H] <sup>-</sup> | -1.5 | 59.0145, 573.4044<br>573.4186, 125.0613              | E    |
| 49 | 13.95 | Azelaic acid                | C <sub>9</sub> H <sub>16</sub> O <sub>4</sub>   | 187.0974 | [M-H] <sup>-</sup> | -0.6 | 125.0972, 187.0989<br>87.0666, 123.0818<br>169.0857  | E    |
| 50 | 22.24 | Caffeic acid                | C <sub>9</sub> H <sub>8</sub> O <sub>4</sub>    | 181.0496 | [M+H] <sup>+</sup> | 0.4  | 181.1616, 139.0383<br>181.0472, 149.0228             | F    |
| 51 | 10.29 | olivetolic acid             | C <sub>12</sub> H <sub>16</sub> O <sub>4</sub>  | 225.1101 | [M+H] <sup>+</sup> | -9   | 225.1340, 209.0293<br>225.0865, 211.0095             | F    |
| 52 | 21.75 | Oleuropein                  | C <sub>25</sub> H <sub>32</sub> O <sub>13</sub> | 539.1809 | [M-H] <sup>-</sup> | 7.3  | 539.1851, 152.9942<br>539.1628, 208.9344<br>385.1766 | F    |

Continued Table S2

|    |       |                                                                   |                                                 |          |                    |      |                                                      |   |
|----|-------|-------------------------------------------------------------------|-------------------------------------------------|----------|--------------------|------|------------------------------------------------------|---|
| 53 | 24.93 | Maslinic acid                                                     | C <sub>30</sub> H <sub>48</sub> O <sub>4</sub>  | 471.3467 | [M-H] <sup>-</sup> | -2.5 | 471.3465, 100.9327<br>471.3747, 112.985<br>453.3335  | F |
| 54 | 22.94 | TILIROSIDE                                                        | C <sub>30</sub> H <sub>26</sub> O <sub>13</sub> | 593.1373 | [M-H] <sup>-</sup> | -0.1 | 121.0296, 593.1304<br>121.0379, 505.1128<br>525.1143 | G |
| 55 | 16.24 | ISOMUCRONULATOL                                                   | C <sub>17</sub> H <sub>18</sub> O <sub>5</sub>  | 303.1204 | [M+H] <sup>+</sup> | -7.5 | 303.1452, 303.1169<br>271.2647, 131.0837             | G |
| 56 | 16.30 | Glycitein                                                         | C <sub>16</sub> H <sub>12</sub> O <sub>5</sub>  | 285.0760 | [M+H] <sup>+</sup> | 0.9  | 285.0756, 285.0991<br>169.0615, 79.0522              | G |
| 57 | 13.37 | CALYCOSIN                                                         | C <sub>16</sub> H <sub>12</sub> O <sub>5</sub>  | 285.0757 | [M+H] <sup>+</sup> | 0.1  | 285.0750, 285.0892<br>285.1048, 185.0585             | G |
| 58 | 23.64 | (6aR, 11aR)-3-hydroxy-9,10-dimethoxypterocarpan-7-O-β-D-glucoside | C <sub>23</sub> H <sub>26</sub> O <sub>10</sub> | 463.1642 | [M+H] <sup>+</sup> | 9.5  | 407.0996, 463.1674<br>463.1842, 463.2638<br>275.0078 | G |
| 59 | 20.55 | Pratensein<br>7-O-glucopyranoside                                 | C <sub>22</sub> H <sub>22</sub> O <sub>11</sub> | 461.1082 | [M-H] <sup>-</sup> | -1.4 | 121.0286, 417.0826<br>461.1103, 104.9257<br>163.0404 | G |
| 60 | 23.81 | 7,2'-dihydroxy-3',4'-dimethoxysoflavane-7-O-glucoside             | C <sub>23</sub> H <sub>28</sub> O <sub>10</sub> | 463.1571 | [M-H] <sup>-</sup> | -8.3 | 209.1176, 253.1086<br>135.0454, 209.1326             | G |

Continued Table S2

|    |       |                                |                                                              |          |                    |      |                                                      |   |
|----|-------|--------------------------------|--------------------------------------------------------------|----------|--------------------|------|------------------------------------------------------|---|
| 61 | 23.98 | 8beta-Methoxyatractylenolide I | C <sub>16</sub> H <sub>22</sub> O <sub>3</sub>               | 261.1495 | [M-H] <sup>-</sup> | -0.3 | 217.1608                                             | H |
| 62 | 26.23 | Icariside F2                   | C <sub>18</sub> H <sub>26</sub> O <sub>10</sub>              | 401.1417 | [M-H] <sup>-</sup> | -9   | 116.9276, 116.9365<br>100.9329, 121.0282<br>112.9858 | H |
| 63 | 23.53 | atractyloside B                | C <sub>21</sub> H <sub>38</sub> O <sub>10</sub>              | 449.2430 | [M-H] <sup>-</sup> | 8.5  | 449.2441, 391.2861<br>313.2388                       | H |
| 64 | 23.16 | Atractylenolide II             | C <sub>15</sub> H <sub>20</sub> O <sub>2</sub>               | 233.1534 | [M+H] <sup>+</sup> | -0.7 | 233.1528, 217.1215                                   | H |
| 65 | 19.32 | 5-Hydroxymethylfurfural        | C <sub>6</sub> H <sub>6</sub> O <sub>3</sub>                 | 127.0386 | [M+H] <sup>+</sup> | -2.6 | 53.0379, 99.0444<br>81.0336, 57.0334<br>55.017       | H |
| 66 | 17.97 | Eudesma-4(15),7(11)-dien-8-one | C <sub>15</sub> H <sub>22</sub> O                            | 219.1740 | [M+H] <sup>+</sup> | -1.4 | 219.1727, 203.1400<br>219.1580, 121.0996<br>67.0555  | H |
| 67 | 0.88  | Valine                         | C <sub>5</sub> H <sub>11</sub> NO <sub>2</sub>               | 118.0861 | [M+H] <sup>+</sup> | -0.9 | 58.0667, 55.0549<br>59.0731, 118.0919<br>72.0851     | H |
| 68 | 0.91  | D-Proline                      | C <sub>5</sub> H <sub>9</sub> NO <sub>2</sub>                | 116.0705 | [M+H] <sup>+</sup> | -0.5 | 70.0715, 116.0745                                    | H |
| 69 | 19.33 | Uridine                        | C <sub>9</sub> H <sub>12</sub> N <sub>2</sub> O <sub>6</sub> | 245.0758 | [M+H] <sup>+</sup> | -4   | 245.0768, 245.0856<br>245.0998, 245.1174<br>115.0397 | H |
| 70 | 27.91 | Stearic acid                   | C <sub>18</sub> H <sub>36</sub> O <sub>2</sub>               | 285.2789 | [M+H] <sup>+</sup> | 0.4  | 285.2747, 285.2864<br>57.0693, 285.247<br>89.059     | H |

Continued Table S2

|    |       |                |                                                               |          |                    |   |                                                                |   |
|----|-------|----------------|---------------------------------------------------------------|----------|--------------------|---|----------------------------------------------------------------|---|
| 71 | 6.34  | D-Tetraandrine | C <sub>38</sub> H <sub>42</sub> N <sub>2</sub> O <sub>6</sub> | 623.3122 | [M+H] <sup>+</sup> | 1 | 623.3088, 594.3022<br>592.2617, 580.2717<br>192.0949, 176.1028 | I |
| 72 | 12.66 | Cycleanine     | C <sub>38</sub> H <sub>42</sub> N <sub>2</sub> O <sub>6</sub> | 622.3042 | [M+H] <sup>+</sup> | 0 | 623.3129                                                       | I |

**Note:** A: *Angelica sinensis* (Oliv.) Diels; B: *Paeonia sinjiangensis* K. Y. Pan; C: *Panax pseudo-ginseng* var. *notoginseng* (Burkill) Hoo et Tseng; D: *Lycopus maackianus* (Maxim. ex Herder) V. Komarov; E: *Achyranthes bidentata* Blume; F: *Ligustrum lucidum* W. T. Aiton; G: *Astragalus membranaceus* Moench; H: *Atractylodes macrocephala* Koidz.; I: *Sinomenium acutum* (Thunb.) Rehder & E. H. Wilson.

Table. S3 The top 18 active ingredients with degree in the ingredient - target network

| No. | Compounds                                          | Molecular formula                                             | M (Da) | Degree |
|-----|----------------------------------------------------|---------------------------------------------------------------|--------|--------|
| 1   | D-Tetraandrine                                     | C <sub>38</sub> H <sub>42</sub> N <sub>2</sub> O <sub>6</sub> | 622.75 | 77     |
| 2   | Paeonilactone C                                    | C <sub>17</sub> H <sub>18</sub> O <sub>6</sub>                | 318.32 | 72     |
| 3   | Quercetin                                          | C <sub>15</sub> H <sub>10</sub> O <sub>7</sub>                | 301.04 | 68     |
| 4   | (Z)-3-(2-Hydroxybutylidene)isobenzofuran-1(3H)-one | C <sub>12</sub> H <sub>12</sub> O <sub>3</sub>                | 204.22 | 67     |
| 5   | Levistilide A                                      | C <sub>24</sub> H <sub>28</sub> O <sub>4</sub>                | 380.48 | 63     |
| 6   | senkyunolide O                                     | C <sub>24</sub> H <sub>28</sub> O <sub>4</sub>                | 380.48 | 63     |
| 7   | inokosterone                                       | C <sub>27</sub> H <sub>44</sub> O <sub>7</sub>                | 481.32 | 62     |
| 8   | Maslinic acid                                      | C <sub>30</sub> H <sub>48</sub> O <sub>4</sub>                | 471.35 | 62     |
| 9   | Corosolic acid                                     | C <sub>30</sub> H <sub>48</sub> O <sub>4</sub>                | 471.35 | 59     |
| 10  | Ginsenoside Rk3                                    | C <sub>36</sub> H <sub>60</sub> O <sub>8</sub>                | 621.43 | 58     |
| 11  | Kaempferol                                         | C <sub>15</sub> H <sub>10</sub> O <sub>6</sub>                | 287.05 | 58     |
| 12  | CALYCOSIN                                          | C <sub>16</sub> H <sub>12</sub> O <sub>5</sub>                | 285.08 | 58     |
| 13  | coniferyl ferulate                                 | C <sub>20</sub> H <sub>20</sub> O <sub>6</sub>                | 356.37 | 57     |
| 14  | Luteolin                                           | C <sub>15</sub> H <sub>10</sub> O <sub>6</sub>                | 287.05 | 57     |
| 15  | Albiflorin                                         | C <sub>23</sub> H <sub>28</sub> O <sub>11</sub>               | 480.46 | 55     |
| 16  | Ferulic acid                                       | C <sub>10</sub> H <sub>10</sub> O <sub>4</sub>                | 194.18 | 54     |

Continued Table. S3

---

|           |                           |                                                   |               |           |
|-----------|---------------------------|---------------------------------------------------|---------------|-----------|
| <b>17</b> | <b>Paeoniflorin</b>       | <b>C<sub>23</sub>H<sub>28</sub>O<sub>11</sub></b> | <b>480.47</b> | <b>51</b> |
| <b>18</b> | Ligustilide/Z-Ligustilide | C <sub>12</sub> H <sub>14</sub> O <sub>2</sub>    | 190.24        | 48        |

---

Figure S1 The positive and negative ion flow diagram marked by standard samples.

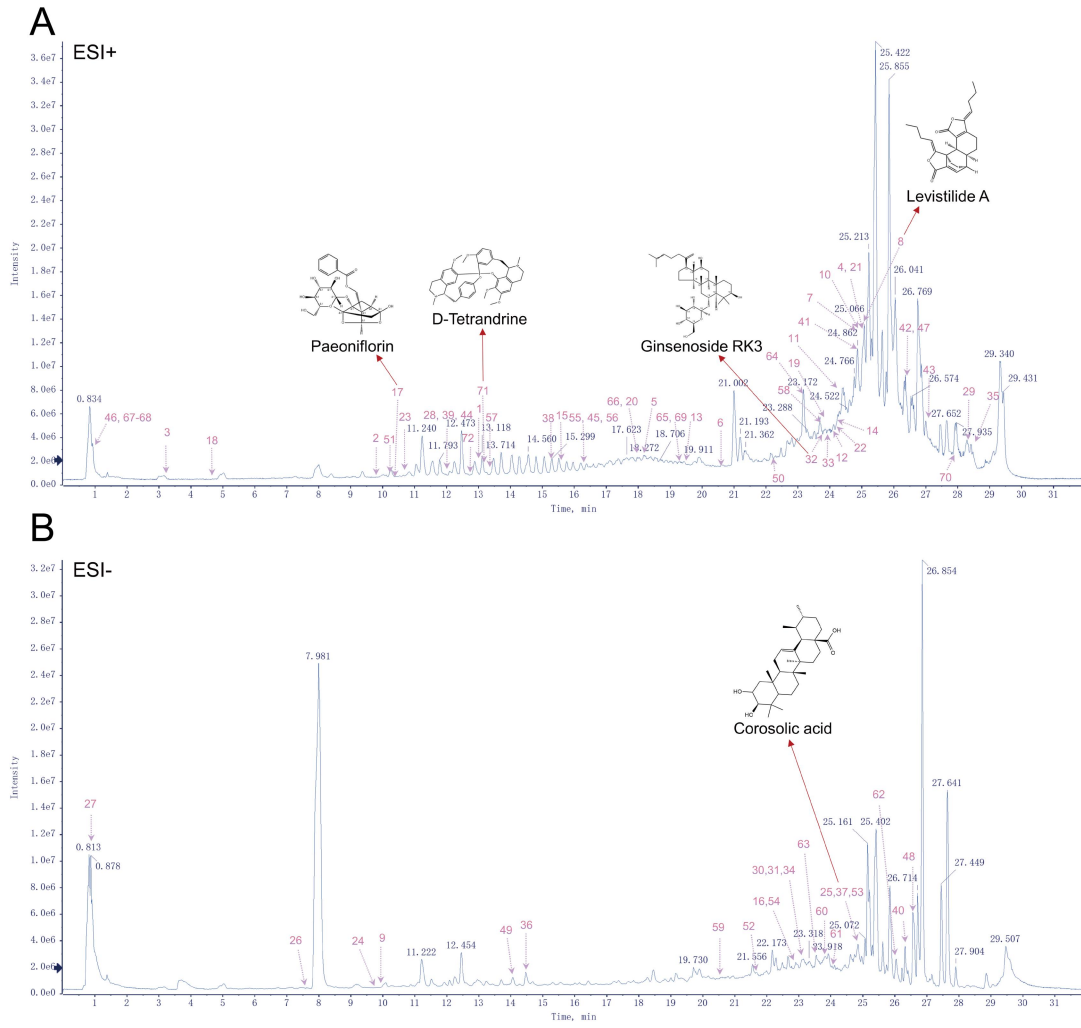

Figure S2

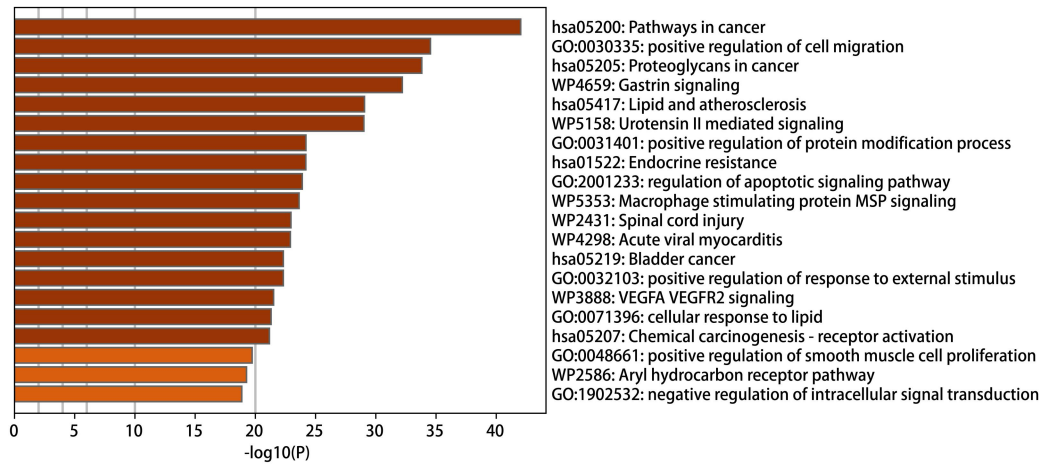

Figure S3

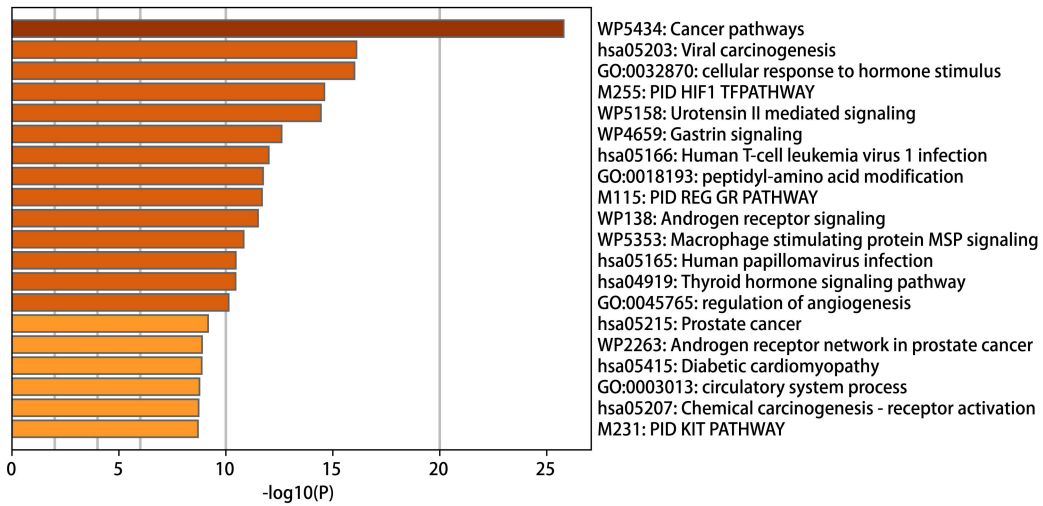

Supplement: MOESM1 [file 13020_2025_1220_MOESM1_ESM.pdf]
